# Supplementary material for: Stimulation of Mammalian G-protein-responsive Adenylyl Cyclases by Carbon Dioxide
Source: PubMed Central journal article supplement — J Biol Chem. 2009 Jan 9;284(2):784–91. doi: 10.1074/jbc.M807239200 (PMC2613629; doi:10.1074/jbc.m807239200), 2009-01-09
Supplement: M807239200_1.pdf [file M807239200_1.pdf]

**Table S1.** Mutagenic primers used in this study.

| <b>Protein</b>             | <b>Mutant</b> | <b>Primer</b> | <b>Sequence</b>                                 |
|----------------------------|---------------|---------------|-------------------------------------------------|
| Rv1625 <sub>C204-443</sub> | D256A         | Sense         | 5'-CCTCGGTGCTGTTCGCCGGCCTCGTCGGGTTCACCGAAC-3'   |
| Rv1625 <sub>C204-443</sub> | D256A         | Antisense     | 5'-GTTCGGTGAACCCGACGAGGCCGGCGAACAGCACCGAGG-3'   |
| Slr1991 <sub>120-337</sub> | K177A         | Sense         | 5'-GGCAGTTGGGTGGATGCGTACATCGGTGATGCG-3'         |
| Slr1991 <sub>120-337</sub> | K177A         | Antisense     | 5'-CGCATCACCGATGTACGCATCCACCCAAGTCC-3'          |
| Slr1991 <sub>120-337</sub> | D137A         | Sense         | 5'-ATTACGGTGTGGTGGCGGCCATGCGTAACTTCACCGGC-3'    |
| Slr1991 <sub>120-337</sub> | D137A         | Antisense     | 5'-GCCGGTGAAGTTACGCATGGCCGCCACCAACACCGTAAT-3'   |
| Slr1991 <sub>120-337</sub> | D181A         | Sense         | 5'-GTGGATAGCTACATCGGTGCCCGCGGTTCATGGCCATCTGG-3' |
| Slr1991 <sub>120-337</sub> | D181A         | Antisense     | 5'-CCAGATGGCCATGACCGCGGCACCGATGTAGCTATCCAC-3'.  |
